# Financial Development and Economic Growth: A Review and New Evidence

[Get access >](#)

*Journal of African Economies*, Volume 12, Issue suppl\_2, 1 September 2003,  
Pages ii89–ii110, [https://doi.org/10.1093/jae/12.suppl\\_2.ii89](https://doi.org/10.1093/jae/12.suppl_2.ii89)

**Published:** 01 September 2003

## Abstract

In recent years there has been substantial theoretical and empirical work on the role that financial markets play in fostering economic growth and development. This paper provides a selective review of the literature, as well as new empirical evidence on the relationship between financial development and economic growth for a large sample of countries. While the results indicate that the effect of financial development on growth is positive, the size of the effect varies with different indicators of financial development, estimation method, data frequency and the functional form of the relationship.

This content is only available as a PDF.

Copyright Oxford University Press 2003

**Issue Section:** [Article](#)

You do not currently have access to this article.

## Sign in

 [Get help with access](#)

**Personal account**

**Institutional access**

Oxford University Press uses cookies to enhance your experience on our website. By selecting 'accept' you are agreeing to our use of cookies. You can change your cookie settings at any time. More information can be found in our [Cookie Policy](#).

- Purchase content
- Activate your purchase/trial code

Sign in >

Register

Sign in with  
username/password

Recommend to your librarian

**Institutional account  
management**

Sign in as administrator

## Purchase

[Subscription prices and ordering for this journal](#)

[Purchasing options for books and journals across Oxford Academic](#)

## Short-term Access

To purchase short-term access, please sign in to your personal account above.

Don't already have a personal account? [Register](#)

Financial Development and Economic Growth: A Review and New Evidence - 24 Hours access

EUR €51.00

GBP £44.00

USD \$55.00

## Rental

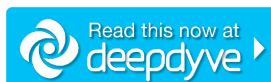

This article is also available for rental through DeepDyve.
